# Supplementary material for: Early kinetics of C reactive protein for cancer-agnostic prediction of therapy response and mortality in patients treated with immune checkpoint inhibitors: a multicenter cohort study
Source: PubMed Central journal article supplement — J Immunother Cancer. 2023 Dec 13;11(12):e007765. doi: 10.1136/jitc-2023-007765 (PMC10729183; doi:10.1136/jitc-2023-007765), 2023-12-13
Supplement: jitc-2023-007765supp001.pdf [file jitc-2023-007765supp001.pdf]

**Supplementary Table 1 | Detailed summary of included tumor entities in the discovery and validation cohorts.** NSCLC – non small cell lung cancer, RCC – renal cell carcinoma, UC – urothelial carcinoma, HNC – head and neck cancer, CRC – colorectal cancer, SCLC – small cell lung cancer, CUP – cancer of unknown primary, HCC – hepatocellular carcinoma

|                          | <b>Discovery cohort 1<br/>(n=562)</b> | <b>Validation cohort 2<br/>(n=474)</b> |
|--------------------------|---------------------------------------|----------------------------------------|
| <b>Cancer types</b>      |                                       |                                        |
| NSCLC                    | 231 (41.1%)                           | 126 (26.6%)                            |
| Melanoma                 | 95 (16.9%)                            | 172 (36.3%)                            |
| RCC                      | 73 (13%)                              | 38 (8.0%)                              |
| UC                       | 46 (8.2%)                             | 21 (4.4%)                              |
| HNC                      | 20 (3.6%)                             | 32 (6.8%)                              |
| CRC                      | 12 (2.1%)                             | 8 (1.7%)                               |
| SCLC                     | 6 (1.1%)                              | 2 (0.4%)                               |
| Breast cancer            | 11 (2%)                               |                                        |
| CUP                      | 9 (1.6%)                              | 2 (0.4%)                               |
| Prostate cancer          | 3 (0.5%)                              |                                        |
| Esophagus/gastric cancer | 12 (2.1%)                             | 1 (0.2%)                               |
| Mesothelioma             | 2 (0.4%)                              | 4 (0.8%)                               |
| Small bowel              | 1 (0.2%)                              |                                        |
| Pancreatic cancer        | 4 (0.7%)                              |                                        |
| Merkel cell carcinoma    |                                       | 5 (1.1%)                               |
| Anal carcinoma           | 3 (0.5%)                              |                                        |
| Squamous cell (skin)     | 3 (0.5%)                              |                                        |
| Thymic carcinoma         | 2 (0.4%)                              |                                        |
| Thyroid carcinoma        | 2 (0.4%)                              |                                        |
| Bile duct carcinoma      | 1 (0.2%)                              |                                        |
| Cervical cancer          | 1 (0.2%)                              | 7 (1.5%)                               |
| HCC                      | 1 (0.2%)                              | 13 (2.7%)                              |
| Sarcoma                  | 2 (0.4%)                              | 14 (3.0%)                              |
| Other cancers            | 22 (3.9%)                             | 29 (6.1%)                              |

**Supplementary Table 2 | Uni- and multivariable logistic regression models for the original and refined model for early CRP kinetics in the validation cohort. OR – odds ratio, CI – confidence interval**

| Variable                        | Original model       |              |                        |              | Refined model          |              |
|---------------------------------|----------------------|--------------|------------------------|--------------|------------------------|--------------|
|                                 | Univariable analysis |              | Multivariable analysis |              | Multivariable analysis |              |
|                                 | OR (95% CI)          | p-value      | OR (95% CI)            | p-value      | OR (95% CI)            | p-value      |
| <b>Age (continuously coded)</b> | 1.001 (0.987-1.016)  | 0.851        |                        |              |                        |              |
| <b>Sex</b>                      |                      |              |                        |              |                        |              |
| Male                            | 1 (reference)        |              |                        |              |                        |              |
| Female                          | 0.893 (0.603-1.324)  | 0.574        |                        |              |                        |              |
| <b>ECOG</b>                     |                      |              |                        |              |                        |              |
| ECOG 1                          | 1 (reference)        |              | 1 (reference)          |              | 1 (reference)          |              |
| ECOG >1                         | 0.522 (0.319-0.852)  | <b>0.009</b> | 0.489 (0.273-0.875)    | <b>0.016</b> | 0.510 (0.285-0.914)    | <b>0.024</b> |
| <b>Charlson Index</b>           | 1.015 (0.927-1.111)  | 0.747        |                        |              |                        |              |
| <b>Baseline CRP</b>             |                      |              |                        |              |                        |              |
| Low (<median)                   | 1 (reference)        |              | 1 (reference)          |              | 1 (reference)          |              |
| High (>=median)                 | 0.616 (0.416-0.912)  | <b>0.015</b> | 0.699 (0.440-1.109)    | 0.129        | 0.733 (0.439-1.225)    | 0.236        |
| <b>Cancer type</b>              |                      |              |                        |              |                        |              |
| NSCLC                           | 1 (reference)        |              | 1 (reference)          |              | 1 (reference)          |              |
| Melanoma                        | 1.330 (0.802-2.204)  | 0.269        | 1.022 (0.595-1.755)    | 0.938        | 0.950 (0.549-1.645)    | 0.855        |
| RCC                             | 0.840 (0.361-1.955)  | 0.685        | 0.765 (0.314-1.862)    | 0.555        | 0.781 (0.321-1.900)    | 0.586        |
| UC                              | 0.637 (0.200-2.027)  | 0.445        | 0.648 (0.195-2.155)    | 0.479        | 0.611 (0.184-2.033)    | 0.422        |
| Other                           | 1.843 (1.074-3.164)  | <b>0.027</b> | 2.022 (1.127-3.626)    | <b>0.018</b> | 1.941 (1.081-3.486)    | <b>0.026</b> |
| <b>Stage at ICI start</b>       |                      |              |                        |              |                        |              |
| II+III                          | 1 (reference)        |              |                        |              | 1 (reference)          |              |
| IV                              | 1.549 (0.767-3.129)  | 0.222        |                        |              | 0.294 (0.121 -0.716)   | <b>0.007</b> |
| <b>Treatment line</b>           |                      |              |                        |              |                        |              |
| 1 <sup>st</sup> line            | 1 (reference)        |              |                        |              |                        |              |
| 2 <sup>nd</sup> line or higher  | 0.691 (0.463-1.031)  | 0.070        |                        |              |                        |              |
| <b>Additional treatments</b>    |                      |              |                        |              |                        |              |
| No additional treatment         | 1 (reference)        |              |                        |              |                        |              |
| Radiotherapy                    | 1.431 (0.831-2.463)  | 0.196        |                        |              |                        |              |
| Chemotherapy                    | 1.454 (0.620-5.748)  | 0.264        |                        |              |                        |              |
| Targeted therapy                | 2.356 (0.292-1.277)  | 0.191        |                        |              |                        |              |
| <b>CRP response</b>             |                      |              |                        |              |                        |              |
| CRP non-responder               | 1 (reference)        |              | 1 (reference)          |              |                        |              |
| CRP responder                   | 1.440 (0.940-2.207)  | 0.094        | 1.515 (0.963-2.384)    | 0.072        |                        |              |
| CRP flare-responder             | 2.856 (1.548-5.270)  | <b>0.001</b> | 3.015 (1.595-5.700)    | <b>0.001</b> |                        |              |

| Variable            | Original model       |                 |                        |                 | Refined model          |                 |
|---------------------|----------------------|-----------------|------------------------|-----------------|------------------------|-----------------|
|                     | Univariable analysis |                 | Multivariable analysis |                 | Multivariable analysis |                 |
|                     | OR (95% CI)          | <i>p</i> -value | OR (95% CI)            | <i>p</i> -value | OR (95% CI)            | <i>p</i> -value |
| <b>CRP response</b> |                      |                 |                        |                 |                        |                 |
| CRP non-responder   | 1 (reference)        |                 |                        |                 | 1 (reference)          |                 |
| CRP responder       | 1.729 (1.061-2.819)  | <b>0.028</b>    |                        |                 | 1.792 (1.065-3.017)    | <b>0.028</b>    |
| CRP flare-responder | 3.073 (1.599-5.907)  | <b>0.001</b>    |                        |                 | 3.045 (1.544-6.003)    | <b>0.001</b>    |
| All-normal CRP      | 2.207 (1.302-3.742)  | <b>0.003</b>    |                        |                 | 1.670 (0.919-3.034)    | 0.093           |

**Supplementary Table 3 | Uni- and multivariable Cox regression models for PFS for the original and refined model for early CRP kinetics in the validation cohort. HR – hazard ratio, CI – confidence interval**

| Variable                        | Original model       |                  |                        |                  | Refined model          |                  |
|---------------------------------|----------------------|------------------|------------------------|------------------|------------------------|------------------|
|                                 | Univariable analysis |                  | Multivariable analysis |                  | Multivariable analysis |                  |
|                                 | HR (95% CI)          | p-value          | HR (95% CI)            | p-value          | HR (95% CI)            | p-value          |
| <b>Age (continuously coded)</b> | 1.00 (0.99-1.01)     | 0.578            |                        |                  |                        |                  |
| <b>Sex</b>                      |                      |                  |                        |                  |                        |                  |
| Male                            | 1 (reference)        |                  |                        |                  |                        |                  |
| Female                          | 1.08 (0.87-1.34)     | 0.484            |                        |                  |                        |                  |
| <b>ECOG</b>                     |                      |                  |                        |                  |                        |                  |
| ECOG 1                          | 1 (reference)        |                  | 1 (reference)          |                  | 1 (reference)          |                  |
| ECOG >1                         | 1.83 (1.44-2.33)     | <b>&lt;0.001</b> | 1.64 (1.22-2.19)       | <b>0.001</b>     | 1.62 (1.21-2.17)       | <b>0.001</b>     |
| <b>Charlson Index</b>           | 1.04 (1.00-1.10)     | 0.078            |                        |                  |                        |                  |
| <b>Baseline CRP</b>             |                      |                  |                        |                  |                        |                  |
| Low (<median)                   | 1 (reference)        |                  | 1 (reference)          |                  | 1 (reference)          |                  |
| High (>=median)                 | 1.95 (1.57-2.42)     | <b>&lt;0.001</b> | 1.88 (1.47-2.41)       | <b>&lt;0.001</b> | 1.81 (1.39-2.36)       | <b>&lt;0.001</b> |
| <b>Cancer type</b>              |                      |                  |                        |                  |                        |                  |
| NSCLC                           | 1 (reference)        |                  | 1 (reference)          |                  | 1 (reference)          |                  |
| Melanoma                        | 0.72 (0.55-0.95)     | <b>0.022</b>     | 1.06 (0.78-1.42)       | 0.717            | 1.12 (0.83-1.51)       | 0.463            |
| RCC                             | 0.79 (0.52-1.22)     | 0.285            | 0.79 (0.51-1.22)       | 0.287            | 0.78 (0.50-1.21)       | 0.273            |
| UC                              | 1.81 (1.10-2.97)     | <b>0.019</b>     | 2.18 (1.30-3.64)       | <b>0.003</b>     | 2.36 (1.41-3.95)       | <b>0.001</b>     |
| Other                           | 0.81 (0.60-1.08)     | 0.156            | 0.79 (0.58-1.08)       | 0.147            | 0.80 (0.58-1.09)       | 0.164            |
| <b>Stage at ICI start</b>       |                      |                  |                        |                  |                        |                  |
| II+III                          | 1 (reference)        |                  |                        |                  |                        |                  |
| IV                              | 1.22 (0.87-1.72)     | 0.254            |                        |                  |                        |                  |
| <b>Treatment line</b>           |                      |                  |                        |                  |                        |                  |
| 1 <sup>st</sup> line            | 1 (reference)        |                  |                        |                  |                        |                  |
| 2 <sup>nd</sup> line or higher  | 1.24 (0.99-1.56)     | 0.060            |                        |                  |                        |                  |
| <b>Additional treatments</b>    |                      |                  |                        |                  |                        |                  |
| No additional treatments        | 1 (reference)        |                  |                        |                  |                        |                  |
| Radiotherapy                    | 1.08 (0.80-1.46)     | 0.617            |                        |                  |                        |                  |
| Chemotherapy                    | 0.91 (0.45-1.84)     | 0.794            |                        |                  |                        |                  |
| Targeted therapy                | 1.12 (0.78-1.59)     | 0.547            |                        |                  |                        |                  |
| <b>CRP response</b>             |                      |                  |                        |                  |                        |                  |
| CRP non-responder               | 1 (reference)        |                  | 1 (reference)          |                  |                        |                  |
| CRP responder                   | 0.92 (0.72-1.16)     | 0.476            | 0.76 (0.59-0.98)       | <b>0.026</b>     |                        |                  |
| CRP flare-responder             | 0.65 (0.43-0.97)     | <b>0.034</b>     | 0.66 (0.44-0.99)       | <b>0.044</b>     |                        |                  |

| Variable            | Original model       |                  |                        |         | Refined model          |              |
|---------------------|----------------------|------------------|------------------------|---------|------------------------|--------------|
|                     | Univariable analysis |                  | Multivariable analysis |         | Multivariable analysis |              |
|                     | HR (95% CI)          | p-value          | HR (95% CI)            | p-value | HR (95% CI)            | p-value      |
| <b>CRP response</b> |                      |                  |                        |         |                        |              |
| CRP non-responder   | 1 (reference)        |                  |                        |         | 1 (reference)          |              |
| CRP responder       | 0.79 (0.62-1.02)     | 0.072            |                        |         | 0.64 (0.49-0.83)       | <b>0.001</b> |
| CRP flare-responder | 0.59 (0.40-0.89)     | <b>0.011</b>     |                        |         | 0.63 (0.41-0.95)       | <b>0.026</b> |
| All-normal CRP      | 0.47 (0.33-0.66)     | <b>&lt;0.001</b> |                        |         | 0.62 (0.43-0.90)       | <b>0.011</b> |

**Supplementary Table 4 | Uni- and multivariable Cox regression models for OS for the original and refined model for early CRP kinetics in the validation cohort. HR – hazard ratio, CI – confidence interval**

| Variable                        | Original model       |                  |                        |                  | Refined model          |                  |
|---------------------------------|----------------------|------------------|------------------------|------------------|------------------------|------------------|
|                                 | Univariable analysis |                  | Multivariable analysis |                  | Multivariable analysis |                  |
|                                 | HR (95% CI)          | p-value          | HR (95% CI)            | p-value          | HR (95% CI)            | p-value          |
| <b>Age (continuously coded)</b> | 1.01 (1.00-1.02)     | <b>0.029</b>     | 1.00 (0.99-1.02)       | 0.640            | 1.002 (0.99-1.01)      | 0.746            |
| <b>Sex</b>                      |                      |                  |                        |                  |                        |                  |
| Male                            | 1 (reference)        |                  |                        |                  |                        |                  |
| Female                          | 1.19 (0.90-1.59)     | 0.207            |                        |                  |                        |                  |
| <b>ECOG</b>                     |                      |                  |                        |                  |                        |                  |
| ECOG 1                          | 1 (reference)        |                  | 1 (reference)          |                  | 1 (reference)          |                  |
| ECOG >1                         | 2.69 (2.00-3.62)     | <b>&lt;0.001</b> | 2.09 (1.43-3.06)       | <b>&lt;0.001</b> | 2.10 (1.43-3.07)       | <b>&lt;0.001</b> |
| <b>Charlson Index</b>           | 1.05 (0.99-1.12)     | 0.117            |                        |                  | 1.07 (1.03-1.11)       | <b>&lt;0.001</b> |
| <b>Baseline CRP</b>             |                      |                  |                        |                  |                        |                  |
| Low (<median)                   | 1 (reference)        |                  | 1 (reference)          |                  | 1 (reference)          |                  |
| High (>=median)                 | 2.63 (1.99-3.48)     | <b>&lt;0.001</b> | 2.29 (1.59-3.02)       | <b>&lt;0.001</b> | 1.86 (1.32-2.61)       | <b>&lt;0.001</b> |
| <b>Cancer type</b>              |                      |                  |                        |                  |                        |                  |
| NSCLC                           | 1 (reference)        |                  | 1 (reference)          |                  | 1 (reference)          |                  |
| Melanoma                        | 0.51 (0.35-0.73)     | <b>&lt;0.001</b> | 0.87 (0.58-1.31)       | 0.503            | 0.94 (0.62-1.41)       | 0.749            |
| RCC                             | 0.83 (0.49-1.42)     | 0.499            | 0.80 (0.46-1.39)       | 0.431            | 0.79 (0.45-1.36)       | 0.391            |
| UC                              | 1.43 (0.75-2.72)     | 0.278            | 1.71 (0.86-3.40)       | 0.127            | 1.90 (0.95-3.78)       | 0.069            |
| Other                           | 0.78 (0.54-1.12)     | 0.177            | 0.73 (0.48-1.12)       | 0.154            | 0.74 (0.48-1.13)       | 0.162            |
| <b>Stage at ICI start</b>       |                      |                  |                        |                  |                        |                  |
| II+III                          | 1 (reference)        |                  |                        |                  |                        |                  |
| IV                              | 0.95 (0.62-1.45)     | 0.819            |                        |                  |                        |                  |
| <b>Treatment line</b>           |                      |                  |                        |                  |                        |                  |
| 1 <sup>st</sup> line            | 1 (reference)        |                  | 1 (reference)          |                  | 1 (reference)          |                  |
| 2 <sup>nd</sup> line or higher  | 1.35 (1.00-1.83)     | <b>0.049</b>     | 1.16 (0.83-1.63)       | 0.370            | 1.15 (0.82-1.61)       | 0.421            |
| <b>Additional treatments</b>    |                      |                  |                        |                  |                        |                  |
| No additional treatments        | 1 (reference)        |                  |                        |                  |                        |                  |
| Radiotherapy                    | 0.84 (0.56-1.25)     | 0.384            |                        |                  |                        |                  |
| Chemotherapy                    | 0.56 (0.21-1.51)     | 0.250            |                        |                  |                        |                  |
| Targeted therapy                | 0.93 (0.59-1.46)     | 0.749            |                        |                  |                        |                  |
| <b>CRP response</b>             |                      |                  |                        |                  |                        |                  |
| CRP non-responder               | 1 (reference)        |                  | 1 (reference)          |                  |                        |                  |
| CRP responder                   | 0.99 (0.73-1.34)     | 0.959            | 0.82 (0.60-1.13)       | 0.225            |                        |                  |
| CRP flare-responder             | 0.71 (0.43-1.18)     | 0.187            | 0.75 (0.44-1.27)       | 0.289            |                        |                  |

| Variable            | Original model       |                  |                        |                 | Refined model          |                 |
|---------------------|----------------------|------------------|------------------------|-----------------|------------------------|-----------------|
|                     | Univariable analysis |                  | Multivariable analysis |                 | Multivariable analysis |                 |
|                     | HR (95% CI)          | <i>p</i> -value  | HR (95% CI)            | <i>p</i> -value | HR (95% CI)            | <i>p</i> -value |
| <b>CRP response</b> |                      |                  |                        |                 |                        |                 |
| CRP non-responder   | 1 (reference)        |                  |                        |                 | 1 (reference)          |                 |
| CRP responder       | 0.82 (0.60-0.81)     | 0.221            |                        |                 | 0.71 (0.52-0.99)       | <b>0.042</b>    |
| CRP flare-responder | 0.56 (0.34-0.95)     | <b>0.031</b>     |                        |                 | 0.67 (0.39-1.14)       | 0.143           |
| All-normal CRP      | 0.27 (0.17-0.45)     | <b>&lt;0.001</b> |                        |                 | 0.42 (0.25-0.73)       | <b>0.002</b>    |

**Supplementary Table 5: Characteristics of the pooled study cohorts.** P-values indicate differences between CRP response groups.

| Pooled cohort (n=1036)            |             | Non-CRP responder  | CRP responder    | CRP flare responder  | All-normal CRP    |                 |              |
|-----------------------------------|-------------|--------------------|------------------|----------------------|-------------------|-----------------|--------------|
|                                   |             | N=430 (41.5%)      | N=338 (32.6%)    | N=117 (11.3%)        | N=151 (14.6%)     |                 |              |
|                                   | n (%miss.)  | Summary measure    |                  |                      |                   | p-value         |              |
| <b>Sex</b>                        | 1036 (0%)   |                    |                  |                      |                   |                 |              |
| ---male                           |             | 635 (61.3%)        | 265 (61.6%)      | 216 (63.9)           | 63 (53.9)         | 91 (60.3)       | 0.285        |
| ---female                         |             | 401 (38.7%)        | 165 (38.4)       | 122 (36.1)           | 54 (46.1)         | 60 (39.7)       |              |
| <b>Age (years)</b>                |             | 65 [IQR 55.8-72.5] | 66.4 [IQR 57-73] | 64.5 [IQR 54.7-72.9] | 62.5 [55.8 -74.8] | 66.3 [51 -72.4] | 0.171        |
| <b>ECOG</b>                       | 842 (18.7%) |                    |                  |                      |                   |                 |              |
| ---ECOG 0                         |             | 333 (32.1%)        | 118 (27.4%)      | 90 (26.6%)           | 35 (29.9%)        | 90 (59.6%)      | <0.001       |
| ---ECOG >0                        |             | 509 (49.1%)        | 128 (50.7%)      | 179 (53%)            | 66 (56.4%)        | 46 (30.5%)      |              |
| <b>Charlson Index</b>             | 1036 (0%)   | 9 [IQR 8-10]       | 9 [8-10]         | 9 [9-10]             | 9 [9-11]          | 9 [8-10]        | <b>0.011</b> |
| <b>Cancer types</b>               | 1036 (0%)   |                    |                  |                      |                   |                 |              |
| ---NSCLC                          |             | 357 (34.5%)        | 160 (37.2%)      | 122 (36.1%)          | 48 (41%)          | 27 (17.9%)      | <0.001       |
| ---Melanoma                       |             | 268 (25.9%)        | 88 (20.5%)       | 78 (23.1%)           | 28 (23.9%)        | 74 (49%)        |              |
| ---RCC                            |             | 111 (10.7%)        | 48 (11.2%)       | 38 (11.2%)           | 11 (9.4%)         | 14 (9.3%)       |              |
| ---UC                             |             | 67 (6.5%)          | 33 (7.7%)        | 17 (5%)              | 10 (8.6%)         | 7 (4.6%)        |              |
| ---other                          |             | 223 (22.5%)        | 101 (23.5%)      | 83 (24.6%)           | 20 (17.1%)        | 29 (19.2%)      |              |
| <b>Tumor stage at ICI start</b>   | 990 (4.4%)  |                    |                  |                      |                   |                 |              |
| ---II+III                         |             | 70 (6.8%)          | 29 (6.7%)        | 21 (6.2%)            | 5 (4.3%)          | 15 (9.9%)       | 0.375        |
| ---IV                             |             | 920 (88.8%)        | 386 (89.8%)      | 302 (89.4%)          | 104 (88.9%)       | 128 (84.3%)     |              |
| <b>ICI</b>                        |             |                    |                  |                      |                   |                 |              |
| <b>Treatment line</b>             | 1033 (0.3%) |                    |                  |                      |                   |                 |              |
| ---1 <sup>st</sup> line           |             | 414 (40%)          | 149 (34.7%)      | 139 (41.1%)          | 55 (47%)          | 71 (47%)        | <b>0.024</b> |
| ---2 <sup>nd</sup> line or higher |             | 619 (59.8%)        | 278 (64.7%)      | 199 (58.9%)          | 62 (53%)          | 80 (53%)        |              |
| <b>ICI agent</b>                  | 1036 (0%)   |                    |                  |                      |                   |                 |              |
| ---Nivolumab                      |             | 438 (42.3%)        | 185 (43%)        | 146 (43.2%)          | 47 (40.2%)        | 60 (39.4%)      | <b>0.003</b> |
| ---Pembrolizumab                  |             | 435 (42%)          | 191 (44.4%)      | 138 (40.8%)          | 43 (36.8%)        | 63 (41.7%)      |              |
| ---Atezolizumab                   |             | 41 (4%)            | 22 (5.1%)        | 13 (3.9%)            | 5 (4.3%)          | 1 (0.7%)        |              |
| ---Durvalumab                     |             | 4 (0.4%)           | 0 (0%)           | 1 (0.9%)             | 1 (0.9%)          | 0 (0%)          |              |
| ---Ipilimumab                     |             | 54 (5.2%)          | 14 (3.3%)        | 19 (5.6%)            | 5 (4.3%)          | 16 (10.6%)      |              |
| ---Avelumab                       |             | 4 (0.4%)           | 1 (0.2%)         | 1 (0.3%)             | 1 (0.9%)          | 1 (0.7%)        |              |
| ---Nivolumab/Ipilimumab           |             | 60 (5.8%)          | 17 (4%)          | 18 (5.3%)            | 15 (12.8%)        | 10 (6.6%)       |              |
| <b>Additional treatments</b>      | 1036 (0%)   |                    |                  |                      |                   |                 |              |
| ---Chemotherapy                   |             | 70 (6.8%)          | 18 (4.2%)        | 32 (9.5%)            | 10 (8.6%)         | 10 (6.6%)       | <b>0.029</b> |
| ---Radiotherapy                   |             | 93 (9%)            | 26 (6.1%)        | 31 (9.2%)            | 16 (13.7%)        | 20 (13.3%)      | <b>0.011</b> |
| ---Targeted therapy               |             | 57 (5.5%)          | 23 (5.4%)        | 15 (4.4%)            | 8 (6.8%)          | 11 (7.3%)       | 0.556        |



**Supplementary Table 6 | Exploratory uni- and multivariable Cox regression models for PFS in the refined model of early CRP kinetics excluding CRP at baseline. HR – hazard ratio, CI – confidence interval**

| Variable                        | Univariable analysis |                  | Refined model    |                  |
|---------------------------------|----------------------|------------------|------------------|------------------|
|                                 | HR (95% CI)          | p-value          | HR (95% CI)      | p-value          |
| <b>Age (continuously coded)</b> | 0.99 (0.99-1.00)     | 0.096            |                  |                  |
| <b>Sex</b>                      |                      |                  |                  |                  |
| Male                            | 1 (reference)        |                  |                  |                  |
| Female                          | 1.13 (0.94-1.35)     | 0.202            |                  |                  |
| <b>ECOG</b>                     |                      |                  |                  |                  |
| ECOG 1                          | 1 (reference)        |                  | 1 (reference)    |                  |
| ECOG >1                         | 1.50 (1.12-2.00)     | <b>0.007</b>     | 1.49 (1.10-2.00) | <b>0.009</b>     |
| <b>Charlson Index</b>           | 1.00 (0.97-1.03)     | 0.936            |                  |                  |
| <b>Cancer type</b>              |                      |                  |                  |                  |
| NSCLC                           | 1 (reference)        |                  | 1 (reference)    |                  |
| Melanoma                        | 0.90 (0.70-1.16)     | 0.426            | 0.91 (0.70-1.18) | 0.465            |
| RCC                             | 0.73 (0.55-0.98)     | <b>0.035</b>     | 0.70 (0.52-0.94) | <b>0.017</b>     |
| UC                              | 1.37 (0.99-1.89)     | 0.057            | 1.33 (0.96-1.84) | 0.089            |
| Other                           | 1.13 (0.89-1.44)     | 0.315            | 1.15 (0.90-1.47) | 0.248            |
| <b>Metastatic sites</b>         | 1.08 (0.99-1.17)     | 0.076            |                  |                  |
| <b>Stage at ICI start</b>       |                      |                  |                  |                  |
| II+III                          | 1 (reference)        |                  |                  |                  |
| IV                              | 1.57 (1.00-2.49)     | 0.053            |                  |                  |
| <b>Treatment line</b>           |                      |                  |                  |                  |
| 1 <sup>st</sup> line            | 1 (reference)        |                  |                  |                  |
| 2 <sup>nd</sup> line or higher  | 1.20 (1.00-1.44)     | 0.050            |                  |                  |
| <b>CRP response</b>             |                      |                  |                  |                  |
| CRP non-responder               | 1 (reference)        |                  | 1 (reference)    |                  |
| CRP responder                   | 0.59 (0.48-0.73)     | <b>&lt;0.001</b> | 0.58 (0.47-0.71) | <b>&lt;0.001</b> |
| CRP flare-responder             | 0.66 (0.49-0.89)     | <b>0.006</b>     | 0.61 (0.45-0.83) | <b>0.002</b>     |
| All-normal CRP                  | 0.56 (0.40-0.78)     | <b>0.001</b>     | 0.60 (0.43-0.84) | <b>0.003</b>     |

**Supplementary Table 7 | Exploratory uni- and multivariable Cox regression models for OS in the refined model of early CRP kinetics excluding CRP at baseline. HR – hazard ratio, CI – confidence interval**

| Variable                        | Univariable analysis |                  | Refined model<br>Multivariable analysis |                  |
|---------------------------------|----------------------|------------------|-----------------------------------------|------------------|
|                                 | HR (95% CI)          | p-value          | HR (95% CI)                             | p-value          |
| <b>Age (continuously coded)</b> | 1.00 (0.99-1.01)     | 0.385            |                                         |                  |
| <b>Sex</b>                      |                      |                  |                                         |                  |
| Male                            | 1 (reference)        |                  |                                         |                  |
| Female                          | 1.08 (0.87-1.34)     | 0.477            |                                         |                  |
| <b>ECOG</b>                     |                      |                  |                                         |                  |
| ECOG 1                          | 1 (reference)        |                  | 1 (reference)                           |                  |
| ECOG >1                         | 2.07 (1.39-3.10)     | <b>&lt;0.001</b> | 1.87 (1.25-2.80)                        | <b>0.002</b>     |
| <b>Charlson Index</b>           | 1.10 (1.06-1.14)     | <b>&lt;0.001</b> | 1.07 (1.03-1.11)                        | <b>&lt;0.001</b> |
| <b>Cancer type</b>              |                      |                  |                                         |                  |
| NSCLC                           | 1 (reference)        |                  | 1 (reference)                           |                  |
| Melanoma                        | 0.76 (0.57-1.02)     | 0.071            | 0.71 (0.52-0.95)                        | <b>0.022</b>     |
| RCC                             | 0.46 (0.31-0.69)     | <b>&lt;0.001</b> | 0.43 (0.28-0.65)                        | <b>&lt;0.001</b> |
| UC                              | 1.66 (1.14-2.41)     | <b>0.008</b>     | 1.63 (1.11-2.39)                        | <b>0.012</b>     |
| Other                           | 1.11 (0.84-1.47)     | 0.462            | 1.01 (0.76-1.34)                        | 0.963            |
| <b>Metastatic sites</b>         | 1.21 (1.10-1.33)     | <b>&lt;0.001</b> | 1.24 (1.11-1.38)                        | <b>&lt;0.001</b> |
| <b>Stage at ICI start</b>       |                      |                  |                                         |                  |
| II+III                          | 1 (reference)        |                  | 1 (reference)                           |                  |
| IV                              | 2.03 (1.08-3.80)     | <b>0.028</b>     | 1.55 (0.80-3.01)                        | 0.196            |
| <b>Treatment line</b>           |                      |                  |                                         |                  |
| 1 <sup>st</sup> line            | 1 (reference)        |                  |                                         |                  |
| 2 <sup>nd</sup> line or higher  | 1.14 (0.92-1.41)     | 0.315            |                                         |                  |
| <b>CRP response</b>             |                      |                  |                                         |                  |
| CRP non-responder               | 1 (reference)        |                  | 1 (reference)                           |                  |
| CRP responder                   | 0.64 (0.50-0.81)     | <b>&lt;0.001</b> | 0.57 (0.45-0.73)                        | <b>&lt;0.001</b> |
| CRP flare-responder             | 0.75 (0.54-1.06)     | 0.104            | 0.59 (0.42-0.84)                        | <b>0.004</b>     |
| All-normal CRP                  | 0.46 (0.31-0.69)     | <b>&lt;0.001</b> | 0.52 (0.34-0.78)                        | <b>0.002</b>     |

**Supplementary Table 8 | Uni- and multivariable logistic regression models for ORR for the original and refined model for early CRP kinetics -sensitivity analysis including age, cancer type and stage a priori in the multivariable analysis. OR – odds ratio, CI – confidence interval**

| Variable                        | Original model       |                        |                     |                        | Refined model        |              |
|---------------------------------|----------------------|------------------------|---------------------|------------------------|----------------------|--------------|
|                                 | Univariable analysis | Multivariable analysis |                     | Multivariable analysis |                      |              |
|                                 | OR (95% CI)          | p-value                | OR (95% CI)         | p-value                | OR (95% CI)          | p-value      |
| <b>Age (continuously coded)</b> | 1.028 (1.003-1.034)  | <b>0.022</b>           | 1.024 (1.004-1.044) | <b>0.017</b>           | 1.022 (1.002-1.042)  | <b>0.027</b> |
| <b>Sex</b>                      |                      |                        |                     |                        |                      |              |
| Male                            | 1 (reference)        |                        |                     |                        |                      |              |
| Female                          | 0.771 (0.528-1.126)  | 0.178                  |                     |                        |                      |              |
| <b>ECOG</b>                     |                      |                        |                     |                        |                      |              |
| ECOG 1                          | 1 (reference)        |                        |                     |                        |                      |              |
| ECOG >1                         | 0.690 (0.395-1.204)  | 0.191                  |                     |                        |                      |              |
| <b>Charlson Index</b>           | 0.995 (0.889-1.026)  | 0.209                  |                     |                        |                      |              |
| <b>Baseline CRP</b>             |                      |                        |                     |                        |                      |              |
| Low (<median)                   | 1 (reference)        |                        | 1 (reference)       |                        | 1 (reference)        |              |
| High (≥median)                  | 0.676 (0.465-0.983)  | <b>0.040</b>           | 0.591 (0.383-0.913) | <b>0.018</b>           | 0.635 (0.397-1.017)  | 0.059        |
| <b>Cancer type</b>              |                      |                        |                     |                        |                      |              |
| NSCLC                           | 1 (reference)        |                        | 1 (reference)       |                        | 1 (reference)        |              |
| Melanoma                        | 1.270 (0.761-2.120)  | 0.361                  | 1.108 (0.620-1.981) | 0.729                  | 1.105 (0.620-1.971)  | 0.735        |
| RCC                             | 1.078 (0.606-1.918)  | 0.797                  | 1.599 (0.838-3.050) | 0.155                  | 1.448 (0.757-2.770)  | 0.263        |
| UC                              | 0.526 (0.233-1.188)  | 0.122                  | 0.589 (0.245-1.412) | 0.234                  | 0.629 (0.263-1.502)  | 0.296        |
| Other                           | 0.714 (0.424-1.203)  | 0.206                  | 0.923 (0.509-1.676) | 0.793                  | 0.936 (0.516-1.696)  | 0.826        |
| <b>Metastatic sites</b>         | 0.988 (0.831-1.175)  | 0.896                  |                     |                        |                      |              |
| <b>Stage at ICI start</b>       |                      |                        |                     |                        |                      |              |
| II+III                          | 1 (reference)        |                        | 1 (reference)       |                        | 1 (reference)        |              |
| IV                              | 0.284 (0.126-0.641)  | <b>0.002</b>           | 0.319 (0.130-1.780) | <b>0.012</b>           | 0.281 (0.113 -0.698) | <b>0.006</b> |
| <b>Treatment line</b>           |                      |                        |                     |                        |                      |              |
| 1 <sup>st</sup> line            | 1 (reference)        |                        | 1 (reference)       |                        | 1 (reference)        |              |
| 2 <sup>nd</sup> line or higher  | 0.448 (0.307-0.655)  | <b>&lt;0.001</b>       | 0.478 (0.313-0.731) | <b>0.001</b>           | 0.478 (0.313-0.731)  | <b>0.001</b> |
| <b>Additional treatments</b>    |                      |                        |                     |                        |                      |              |
| no additional treatment         | 1 (reference)        |                        |                     |                        |                      |              |
| Radiotherapy                    | 1.413 (0.418-4.774)  | 0.577                  |                     |                        |                      |              |
| Chemotherapy                    | 1.454 (0.795-2.658)  | 0.224                  |                     |                        |                      |              |
| Targeted therapy                | 2.356 (0.707-7.852)  | 0.163                  |                     |                        |                      |              |

| Variable            | Original model       |                  |                        |                  | Refined model          |                  |
|---------------------|----------------------|------------------|------------------------|------------------|------------------------|------------------|
|                     | Univariable analysis |                  | Multivariable analysis |                  | Multivariable analysis |                  |
|                     | OR (95% CI)          | <i>p</i> -value  | OR (95% CI)            | <i>p</i> -value  | OR (95% CI)            | <i>p</i> -value  |
| <b>CRP response</b> |                      |                  |                        |                  |                        |                  |
| CRP non-responder   | 1 (reference)        |                  | 1 (reference)          |                  |                        |                  |
| CRP responder       | 4.230 (2.714-6.593)  | <b>&lt;0.001</b> | 4.830 (3.005-7.764)    | <b>&lt;0.001</b> |                        |                  |
| CRP flare-responder | 3.030 (1.639-5.603)  | <b>&lt;0.001</b> | 3.222 (1.683-6.166)    | <b>&lt;0.001</b> |                        |                  |
| <b>CRP response</b> |                      |                  |                        |                  |                        |                  |
| CRP non-responder   | 1 (reference)        |                  |                        |                  | 1 (reference)          |                  |
| CRP responder       | 4.385 (2.702-7.117)  | <b>&lt;0.001</b> |                        |                  | 4.963 (2.959-8.321)    | <b>&lt;0.001</b> |
| CRP flare-responder | 3.310 (1.741-6.294)  | <b>&lt;0.001</b> |                        |                  | 3.382 (1.722-6.641)    | <b>&lt;0.001</b> |
| All-normal CRP      | 4.992 (2.592-9.614)  | <b>&lt;0.001</b> |                        |                  | 3.695 (1.825-7.480)    | <b>&lt;0.001</b> |

**Supplementary Table 9 | Uni- and multivariable Cox regression models for PFS for the original and refined model for early CRP kinetics - sensitivity analysis including age, cancer type and stage a priori in the multivariable analysis. OR – odds ratio, CI – confidence interval**

| Variable                        | Original model       |                  |                        |                  | Refined model          |                  |
|---------------------------------|----------------------|------------------|------------------------|------------------|------------------------|------------------|
|                                 | Univariable analysis |                  | Multivariable analysis |                  | Multivariable analysis |                  |
|                                 | HR (95% CI)          | p-value          | HR (95% CI)            | p-value          | HR (95% CI)            | p-value          |
| <b>Age (continuously coded)</b> | 0.99 (0.99-1.00)     | 0.096            | 0.99 (0.98-0.99)       | <b>0.40</b>      | 0.99 (0.98-0.99)       | <b>0.036</b>     |
| <b>Sex</b>                      |                      |                  |                        |                  |                        |                  |
| Male                            | 1 (reference)        |                  |                        |                  |                        |                  |
| Female                          | 1.13 (0.94-1.35)     | 0.202            |                        |                  |                        |                  |
| <b>ECOG</b>                     |                      |                  |                        |                  |                        |                  |
| ECOG 1                          | 1 (reference)        |                  | 1 (reference)          |                  | 1 (reference)          |                  |
| ECOG >1                         | 1.50 (1.12-2.00)     | <b>0.007</b>     | 1.28 (0.95-1.73)       | 0.103            | 1.36 (1.01-1.83)       | <b>0.046</b>     |
| <b>Charlson Index</b>           | 1.00 (0.97-1.03)     | 0.936            |                        |                  |                        |                  |
| <b>Baseline CRP</b>             |                      |                  |                        |                  |                        |                  |
| Low (<median)                   | 1 (reference)        |                  | 1 (reference)          |                  | 1 (reference)          |                  |
| High (>=median)                 | 1.46 (1.22-1.75)     | <b>&lt;0.001</b> | 1.65 (1.36-2.00)       | <b>&lt;0.001</b> | 1.79 (1.45-2.21)       | <b>&lt;0.001</b> |
| <b>Cancer type</b>              |                      |                  |                        |                  |                        |                  |
| NSCLC                           | 1 (reference)        |                  | 1 (reference)          |                  | 1 (reference)          |                  |
| Melanoma                        | 0.90 (0.70-1.16)     | 0.426            | 1.01 (0.77-1.33)       | 0.838            | 1.01 (0.77-1.33)       | 0.918            |
| RCC                             | 0.73 (0.55-0.98)     | <b>0.035</b>     | 0.63 (0.47-0.85)       | <b>0.003</b>     | 0.66 (0.49-0.89)       | <b>0.007</b>     |
| UC                              | 1.37 (0.99-1.89)     | 0.057            | 1.38 (0.99-1.91)       | 0.057            | 1.30 (0.93-1.81)       | 0.123            |
| Other                           | 1.13 (0.89-1.44)     | 0.315            | 1.13 (0.88-1.45)       | 0.352            | 1.16 (0.90-1.49)       | 0.253            |
| <b>Metastatic sites</b>         | 1.08 (0.99-1.17)     | 0.076            |                        |                  |                        |                  |
| <b>Stage at ICI start</b>       |                      |                  |                        |                  |                        |                  |
| II+III                          | 1 (reference)        |                  | 1 (reference)          |                  | 1 (reference)          |                  |
| IV                              | 1.57 (1.00-2.49)     | 0.053            | 1.45 (0.90-2.31)       | 0.123            | 1.47 (0.92-2.36)       | 0.103            |
| <b>Treatment line</b>           |                      |                  |                        |                  |                        |                  |
| 1 <sup>st</sup> line            | 1 (reference)        |                  |                        |                  |                        |                  |
| 2 <sup>nd</sup> line or higher  | 1.20 (1.00-1.44)     | 0.050            |                        |                  |                        |                  |
| <b>Additional treatments</b>    |                      |                  |                        |                  |                        |                  |
| no additional treatment         | 1 (reference)        |                  |                        |                  |                        |                  |
| Radiotherapy                    | 1.051 (0.592-1.868)  | 0.864            |                        |                  |                        |                  |
| Chemotherapy                    | 1.063 (0.777-1.453)  | 0.703            |                        |                  |                        |                  |
| Targeted therapy                | 0.442 (0.183-1.067)  | 0.070            |                        |                  |                        |                  |

| Variable            | Original model       |                  |                        |                  | Refined model          |                  |
|---------------------|----------------------|------------------|------------------------|------------------|------------------------|------------------|
|                     | Univariable analysis |                  | Multivariable analysis |                  | Multivariable analysis |                  |
|                     | HR (95% CI)          | <i>p</i> -value  | HR (95% CI)            | <i>p</i> -value  | HR (95% CI)            | <i>p</i> -value  |
| <b>CRP response</b> |                      |                  |                        |                  |                        |                  |
| CRP non-responder   | 1 (reference)        |                  | 1 (reference)          |                  |                        |                  |
| CRP responder       | 0.63 (0.51-0.77)     | <b>&lt;0.001</b> | 0.52 (0.42-0.65)       | <b>&lt;0.001</b> |                        |                  |
| CRP flare-responder | 0.68 (0.51-0.92)     | <b>0.013</b>     | 0.61 (0.45-0.83)       | <b>0.002</b>     |                        |                  |
| <b>CRP response</b> |                      |                  |                        |                  |                        |                  |
| CRP non-responder   | 1 (reference)        |                  |                        |                  | 1 (reference)          |                  |
| CRP responder       | 0.59 (0.48-0.73)     | <b>&lt;0.001</b> |                        |                  | 0.48 (0.38-0.59)       | <b>&lt;0.001</b> |
| CRP flare-responder | 0.66 (0.49-0.89)     | <b>0.006</b>     |                        |                  | 0.63 (0.46-0.85)       | <b>0.001</b>     |
| All-normal CRP      | 0.56 (0.40-0.78)     | <b>0.001</b>     |                        |                  | 0.74 (0.52-1.05)       | 0.078            |

**Supplementary Table 10 | Uni- and multivariable Cox regression models for OS for the original and refined model for early CRP kinetics - sensitivity analysis including age, cancer type and stage a priori in the multivariable analysis. OR – odds ratio, CI – confidence interval**

| Variable                        | Original model       |                  |                        |                  | Refined model          |                  |
|---------------------------------|----------------------|------------------|------------------------|------------------|------------------------|------------------|
|                                 | Univariable analysis |                  | Multivariable analysis |                  | Multivariable analysis |                  |
|                                 | HR (95% CI)          | p-value          | HR (95% CI)            | p-value          | HR (95% CI)            | p-value          |
| <b>Age (continuously coded)</b> | 1.00 (0.99-1.01)     | 0.385            | 0.99 (0.98-1.00)       | 0.170            | 0.99 (0.98-1.00)       | 0.124            |
| <b>Sex</b>                      |                      |                  |                        |                  |                        |                  |
| Male                            | 1 (reference)        |                  |                        |                  |                        |                  |
| Female                          | 1.08 (0.87-1.34)     | 0.477            |                        |                  |                        |                  |
| <b>ECOG</b>                     |                      |                  |                        |                  |                        |                  |
| ECOG 1                          | 1 (reference)        |                  | 1 (reference)          |                  | 1 (reference)          |                  |
| ECOG >1                         | 2.07 (1.39-3.10)     | <b>&lt;0.001</b> | 1.74 (1.16-2.62)       | <b>0.008</b>     | 1.78 (1.18-2.68)       | <b>0.006</b>     |
| <b>Charlson Index</b>           | 1.10 (1.06-1.14)     | <b>&lt;0.001</b> | 1.08 (1.04-1.12)       | <b>&lt;0.001</b> | 1.08 (1.04-1.13)       | <b>&lt;0.001</b> |
| <b>Baseline CRP</b>             |                      |                  |                        |                  |                        |                  |
| Low (<median)                   | 1 (reference)        |                  | 1 (reference)          |                  | 1 (reference)          |                  |
| High (>=median)                 | 1.79 (1.45-2.20)     | <b>&lt;0.001</b> | 1.87 (1.49-2.35)       | <b>&lt;0.001</b> | 2.00 (1.57-2.55)       | <b>&lt;0.001</b> |
| <b>Cancer type</b>              |                      |                  |                        |                  |                        |                  |
| NSCLC                           | 1 (reference)        |                  | 1 (reference)          |                  | 1 (reference)          |                  |
| Melanoma                        | 0.76 (0.57-1.02)     | 0.071            | 0.84 (0.62-1.14)       | 0.254            | 0.85 (0.62-1.15)       | 0.293            |
| RCC                             | 0.46 (0.31-0.69)     | <b>&lt;0.001</b> | 0.43 (0.28-0.65)       | <b>&lt;0.001</b> | 0.44 (0.29-0.66)       | <b>&lt;0.001</b> |
| UC                              | 1.66 (1.14-2.41)     | <b>0.008</b>     | 1.81 (1.24-2.65)       | <b>0.002</b>     | 1.70 (1.16-2.50)       | <b>0.007</b>     |
| Other                           | 1.11 (0.84-1.47)     | 0.462            | 1.09 (0.81-1.47)       | 0.560            | 1.09 (0.81-1.47)       | 0.560            |
| <b>Metastatic sites</b>         | 1.21 (1.10-1.33)     | <b>&lt;0.001</b> | 1.17 (1.05-1.30)       | <b>0.005</b>     | 1.19 (1.07-1.33)       | <b>0.001</b>     |
| <b>Stage at ICI start</b>       |                      |                  |                        |                  |                        |                  |
| II+III                          | 1 (reference)        |                  | 1 (reference)          |                  | 1 (reference)          |                  |
| IV                              | 2.03 (1.08-3.80)     | <b>0.028</b>     | 1.63 (0.84-3.17)       | 0.149            | 1.62 (0.83-3.15)       | 0.155            |
| <b>Treatment line</b>           |                      |                  |                        |                  |                        |                  |
| 1 <sup>st</sup> line            | 1 (reference)        |                  |                        |                  |                        |                  |
| 2 <sup>nd</sup> line or higher  | 1.14 (0.92-1.41)     | 0.315            |                        |                  |                        |                  |
| <b>Additional treatments</b>    |                      |                  |                        |                  |                        |                  |
| no additional treatment         | 1 (reference)        |                  |                        |                  |                        |                  |
| Radiotherapy                    | 1.341 (0.714-2.520)  | 0.361            |                        |                  |                        |                  |
| Chemotherapy                    | 1.065 (0.735-1.545)  | 0.738            |                        |                  |                        |                  |
| Targeted therapy                | 0.251 (0.062-1.008)  | 0.051            |                        |                  |                        |                  |

| Variable            | Original model       |                  |                        |                  | Refined model          |                  |
|---------------------|----------------------|------------------|------------------------|------------------|------------------------|------------------|
|                     | Univariable analysis |                  | Multivariable analysis |                  | Multivariable analysis |                  |
|                     | HR (95% CI)          | p-value          | HR (95% CI)            | p-value          | HR (95% CI)            | p-value          |
| <b>CRP response</b> |                      |                  |                        |                  |                        |                  |
| CRP non-responder   | 1 (reference)        |                  | 1 (reference)          |                  |                        |                  |
| CRP responder       | 0.73 (0.58-0.92)     | <b>0.008</b>     | 0.57 (0.45-0.73)       | <b>&lt;0.001</b> |                        |                  |
| CRP flare-responder | 0.85 (0.60-1.19)     | 0.339            | 0.67 (0.47-0.95)       | <b>0.025</b>     |                        |                  |
| <b>CRP response</b> |                      |                  |                        |                  |                        |                  |
| CRP non-responder   | 1 (reference)        |                  |                        |                  | 1 (reference)          |                  |
| CRP responder       | 0.64 (0.50-0.81)     | <b>&lt;0.001</b> | NA                     | NA               | 0.46 (0.35-0.59)       | <b>&lt;0.001</b> |
| CRP flare-responder | 0.75 (0.54-1.06)     | 0.104            |                        |                  | 0.61 (0.43-0.87)       | <b>0.006</b>     |
| All-normal CRP      | 0.46 (0.31-0.69)     | <b>&lt;0.001</b> |                        |                  | 0.64 (0.42-0.99)       | <b>0.042</b>     |



## Supplementary Figures

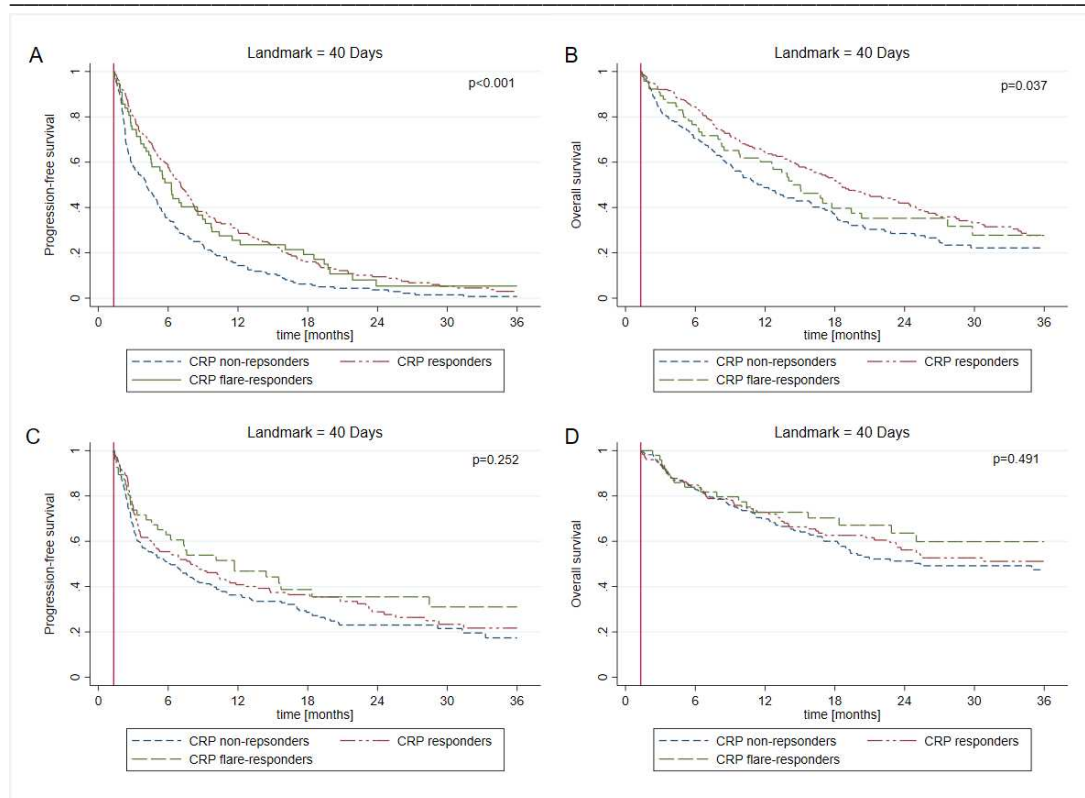

**Supplementary Figure 1** | Landmark analysis showing progression-free survival (PFS) and overall survival (OS) according to previously established CRP response categories for the discovery cohort (A+B) and the validation cohort (C+D)

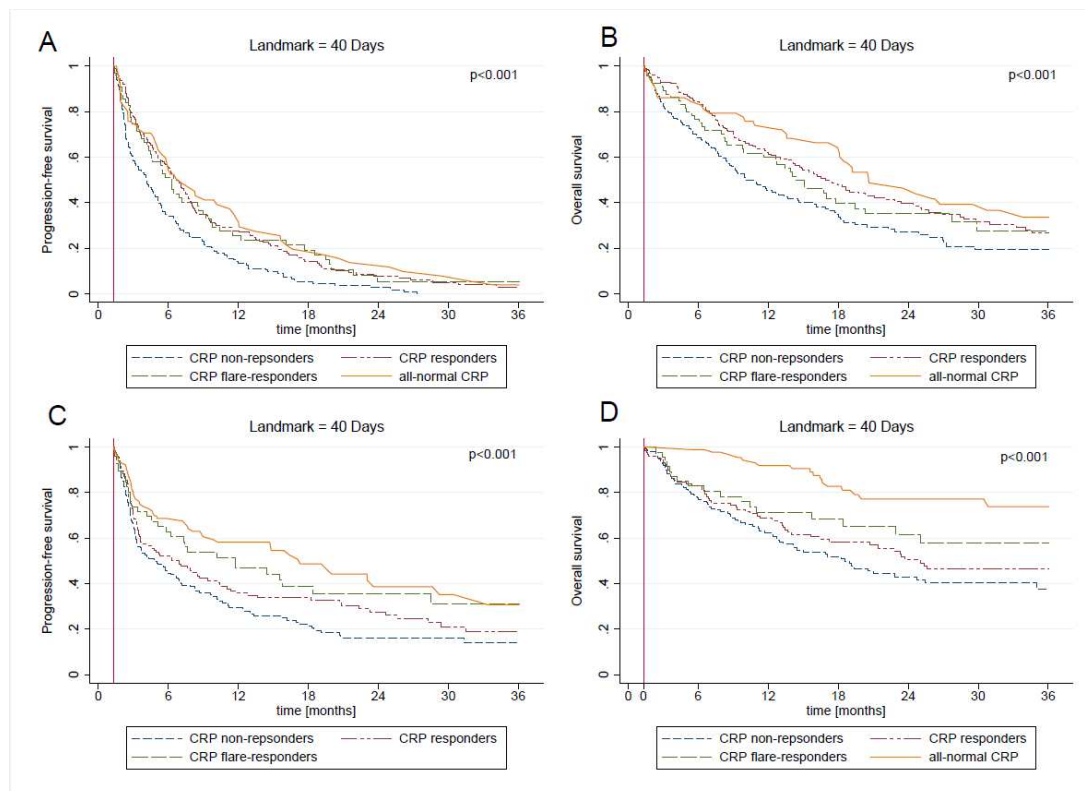

**Supplementary Figure 2** | Landmark analysis showing progression-free survival (PFS) and overall survival (OS) according to CRP response categories including all-normal CRP for the discovery cohort (A+B) and the validation cohort (C+D).
